# Supplementary material for: Proteomic Studies of a Single CNS Synapse Type: The Parallel Fiber/Purkinje Cell Synapse
Source: PLoS Biol. 2009 Apr 14;7(4):e1000083. doi: 10.1371/journal.pbio.1000083 (PMC2672601; doi:10.1371/journal.pbio.1000083)
Supplement: Table S3 — Results are shown of two replicate experiments from either 30 or 50 mice. The detection and confirmation of the proteins through MS and MS/MS analyses are indicated for both experiments. The sequence coverage, number of peptides, and scores obtained from the analysis of the MALDI QqToF MS spectra are given for the 50-mice experiment. The number and sequences of peptides confirmed by MALDI-IT CID MS/MS analyses are shown for each protein. The presence of these proteins in the control experiment, as judged by hypothesis-driven MS/MS analyses, is indicated. When the presence or absence of the protein could not be judged conclusively, due to either depletion of the sample or inconclusive fragmentation, the entry is marked as not available (n/a). n/o (not observed) in the score column refers to the proteins (MS) or peptides (MS/MS) that were not assigned a d′ value from the database search using the XProteo software. (57 KB XLS) [file pbio.1000083.st003.xls]

## Sheet: Table 3
Table 3: Proteins isolated viaVGluRd2				MS	MS	Sequence	Number of	Score MS	MS/MS	MS/MS		Score MS/MS	Peptide
Category	Protein	gi #	NCBI#	30 mice	50 mice	coverage (%)	peptides	(d')	30 mice	50 mice	# peptides	(d')	sequences	In control
TAG	YFP	6453571	CAB61435.1	Y	Y	46.2	13	6.5	Y	Y	2	n/o	GIDFKEDGNILGHK	Y
													TIFFKDDGNYK
													LEYNYNSHNVYITADK
													FSVSGEGEGDATYGK
Tagged protein	Grid2	6680091	NP_032193.1	Y	Y	28.8	29	16.2	Y	Y	9	22.9	RHPPTPPDPSGGLPR	N
													FIIFYDSEYDIR
													AASGFAFGSVPEHR
													GYGIALQHGSPYR
													YMDYSVGVLLR
													TAVGDLNQNEEILQTEK
													NSKPWQGGR
													TMSSIPYQPTPTLGLNLGNDPDR
													VVTEYAWQK
Isolated proteins	Grid2ip	19111166	NP_579933	N	Y	14.3	16	5.1	N	Y	7	n/o	RPDEPPPR	N
(Mus Musculus)													STFLHILAK
													LNSSFKGK
													FLDALSEQLGPR
													YQAFREAPGR
													ALDGLQREAMEELGK
													SCLGIFIPKK
	Homer3	3834613	AAC71025.1	Y	Y	39.8	13	15.3	Y	Y	3	9.8	VAELEAQVAVEPVR	N
													HALTVSYFYDATR
													EAPDTAER
	Shank1	82905881	XP_899334.1	N	Y	14.1	28	2.3	N	Y	7	1.3	FNPDATIWTAK	N
													FLEYVQLGTSDK
													TAAPEEPERLPLHVR
													SIGAAEDDRPYLAPPAMK
													GFFATESSFDPHHR
													SIDEGMFSAEPYLR
													HSKSIDEGMFSAEPYLR
	Shank2	28804747	BAC58120.1	Y	Y	21.5	25	10.7	Y	Y	2	n/o	LLDPSSPLALALSAR	N
													NSPAFLSTDLGDEDVGLGPPAPR
	PSD93	14518291	AAK64496.1	Y	Y	28.1	22	9.5	Y	Y	3	1.4	DYHFVISR	N
													GDQILSVNGIDLR
													INDDLISEFPDK
	PSD95	15928679	AAH14807.1	Y	Y	29.5	18	6.5	Y	Y	4	n/o	VIEDLSGPYIWVPAR	N
													DYHFVSSR
													DLLGEEDIPREPR
													ANDDLLSEFPDK
	Ina	17390900	AAH18383.1	Y	Y	29.1	15	6	Y	Y	8	n/o	ALEAELAALR	N
													VGEGFEETLGEAVISTK
													LPASDGLDLSQAAAR
													LSAPLSGPGASGSFR
													QILELEER
													TNEYKIIR
													EQLQGLNDR
													EYQDLLNVK
	Jakmip1	30409980	NP_848481.1	N	Y	9.4	9	n/o	N	Y	2	n/o	MQQEISELK	N
													LQLQKEALDEQLSQAK
	Gabbr1	131888529	NP_062312	Y	Y	8.6	7	n/o	Y	Y	7	n/o	DILPDYELK	n/a
													THPSATLHNPTR
													RDILPDYELK
													DDLSWSKTDK
													ELEKIIAEK
													EDIDVSILPQLEHCSSK
													RHPPTPPDPSGGLPR
	Mtap6	3171934	CAA75930.1	N	Y	10.1	12	n/o	N	Y	4	n/o	NKDSVPLAPAK	N
													AGPAWMVRR
													GPVTKEPHK
													TTEGPSATKPDDK
	CAST2 beta	32478657	AAP83581.1	N	Y	18.5	24	5.4	N	Y	1	n/o	EVLRENDLLR	N
	Cep152	82885523	XP_923083	N	Y				N	Y	7	n/o	TEFINR	N
													QQELAVAHR
													GPSCGALEPYK
													DMLRYIQESK
													CGDASCRHSGVLAK
													ETEFQACLDQSRK
													TPPRSLSAGAAESAGPSCSR
	Camk2a	28916677	NP_803126.1	Y	Y	24.8	11	6.8	Y	Y	3	n/o	AGAYDFPSPEWDTVTPEAK*	N
													FYFENLWSR
													ITQYLDAGGIPR
	Camk2b	51480474|	AAH80273.1	Y	Y	19.4	8	n/o	Y	Y	2	n/o	LTQYIDGQGRPR	N
													AGAYDFPSPEWDTVTPEAK*
	Catenin delta-2	94398572	XP_986270	N	N	n/a	n/a	n/a	N	Y	5	n/o	SGPALPPEGTLAR	N
													SYWSHK
													AAGQSFSQGTTGR
													SSHGKSYWSHK
													GWAEDVAGMAYALR
	Gm941	82995169	XP_894872	Y	Y	20.4	27	9	Y	Y	5	2.7	GPPELLPDAR	N
													DLPECISLVHVVVLK
													TFFPQQR
													APAPHGPAAAAAASR
													TPPAEGVAPRLYSTR
	MRCK gamma	81174937	Q80UW5	Y	Y	10.4	18	n/o	Y	Y	8	n/o	LELQSALEAEIR	N
													LQKMEASAR
													LGRGGLDDFR
													SLRMGSVFPR
													QSQALQQEVAELR
													EEVLCRLQEENQR
													NVGTQTLPTRPLDHQWK
													RPVSTGSDGLPGETDPLVK
	AMPA2	85861224	NP_038568	N	Y	5.9	8	n/o	N	Y	1	n/o	SAEPSVFVR	N
	Cingulin	94371022	XP_980833	N	Y	15.1	7	3.4	Y	Y	7	n/o	TLPHEQR	Y
													KEHCGTVNR
													EEEGNLAAAKR
													ATKQELLQLR
													DWASEAEKNSGGLSR
													VASETEAMVLGQR
													NPSQKQPFSSFSR
	RPTPmam4	13378306	AAK18741	N	N	n/a	n/a	n/a	N	Y	3	n/o	NRSMDVLPLDR	N
													DRSSPGALNVYVK
													DEFQTLNIVTPR
	Itpr1	6754390	NP_034715	N	Y	5.6	20	n/o	N	Y	10	n/o	LWSEIPSEIAIDDYDSSGTSKDEIK	N
													NKLTFEVVNLAR
													EAFAIVPVSPAEVR
													ATVTVNTSDLGNK
													DQLLEASAATRK
													DDFILEVDR
													NLDWFLR
													NLQEKLESTMK
													CVVQPEAGDLNNPPK
													ACNNTSDR
	Dnahc8	13310482	AAK18309.1	N	Y	5.9	24	n/o	N	Y	12	0.7	FETLITIHVHQR	N
													EELDPALDNVLEK
													MMRIYVDNAAPDK
													DWQAFLDLKK
													KNQYDILDPR
													IYVDNAAPDK
													VKNEVQEVK
													LMEASESVAK
													IDLQRGTVK
													LVQLYETSLVR
													LSLDTMKR
													DEMDEITQGLISVMKR
	Dnahc12	94396852	XP_981204	N	N	n/a	n/a	n/a	N	Y	7	n/o	SIKDVNEPK	N
													TDGECVVSAR
													LVMAAVCVMK
													SVYCEQGYRIK
													HGFMLVGEPFAAK
													LAFDAFLRTAVSGR
													VFYDRLINDEDR
	Zwint	22028168	AAH34870	N	Y	16	5	N/O	N	Y	2	n/o	ATYMDHVDVIK	N
													IMEEFMR
	Lama1	6678656	NP_032506	N	Y	6.9	16	n/o	N	Y	7	n/o	QHIYAEPFYWR	N
													QQGITMKLDELK
													ASYGQLQQSR
													LHFMFDLGKGR
													TLNADLMTLSHR
													FLKESVGTR
													TSKSPGPSK
	HSP 84	123681	P11499	N	Y	14.7	14	3.8	N	Y	2	n/o	VILHLKEDQTEYLEER	n/a
													GVVDSEDLPLNISR
	Plekha7	54038521	AAH84587	N	Y	8.6	20	8.4	N	Y	7	n/o	ENYRVLVGSVK	N
													RPHTPAER
													EATIIRHTSVR
													SRSLLEVPR
													RAFFFQEK
													HLSGSSSPPPR
													EQEEERFR
	Anxa6	13542782	AAH05595.1	Y	Y	45.4	29	13.9	N	Y	2	n/o	DAISGIGTDEK	N
													STPEYFAER
	4930407I10Rik	94399886	XP_001001646	N	Y				N	Y	5	2.1	KDAVRPSPPNDSSGK	N
													CSSAQLASLTSGYGTPGHK
													SWHNPGGVPEFSIENSR
													IVRGAGGEEGTETK
													GGQSSSENDWK
	Periphilin 1	94408554	XP_994796	N	N	n/a	n/a	n/a	N	Y	2	1.5	RPPLLDKIPPR	n/a
													YGYGQFQRER
	Synaptopodin isoform 2	94404501	XP_899657	N	N	n/a	n/a	n/a	N	Y	6	n/o	GAELYAR	n/a
													SSILLIDK
													AKQAPRPSFSTR
													RPLGNFTPPPTYAETLSTAPVASRVR
													SVSPLRSETEARPPSR
													YTTNAPGGFRVASLSPAR
	P140	94390735	XP_998750	N	Y	20.6	20	n/o	N	Y	1	n/o	IIAELESGGSSVPPMK	N
Likely	Myo18a	28436851	AAH46638.1	Y	Y	20.2	16	n/o	Y	Y	3	n/o	AAQQFSK	Y
Contaminants													QGYPDHMVFSEFRR
													VASGSDLHLTDIDSDSNR
	Myo7b	14161694	NP_115770.1	Y	N	10.3	17	n/o	Y	N	2	n/o	SKLTEEVTK	n/a
													QGLLASENWALGQNDRTGK
	Spnb2	56206997	CAI25430.1	N	Y	19.7	37	11.5	N	Y	2	n/o	LTTLELLEVR	Y
													VIESTQDLGNDLAGVMALQR
	Actb	74213524	BAE35572.1	Y	Y	26.6	9	5.9	Y	Y	3	n/o	PRAVFPSIVGR	Y
													DLTDYLMK
													TTGIVMDSGDGVTHTVPIYEGYALPHAILR
